# Supplementary material for: Synthesis, photophysical, electrochemical and laser properties of anthracene conjugated glycodendrimers with triazole as a bridging unit
Source: Royal Society of Chemistry journal article supplement (doi:10.1039/c5ra07901b), 2015-01-01
Supplement: c5ra07901b1.pdf [file c5ra07901b1.pdf]

**Synthesis, photophysical, electrochemical and laser properties of anthracene conjugated glycodendrimers with triazole as bridging units**

Ayyavoo Kannan and Perumal Rajakumar\*

Department of Organic Chemistry, University of Madras, Guindy Campus

Chennai-600 025, India. E-mail: [perumalrajakumar@gmail.com](mailto:perumalrajakumar@gmail.com)

Fax: +91 044 22300488; Tel: +91 044 22351269 ext. 213

**SUPPORTING INFORMATION**

1.  $^1\text{H}$  and  $^{13}\text{C}$  NMR spectra of compounds **6**, **7**, **8**, **9**, **1**, **2**, **3** and **4** ..... p 2-15

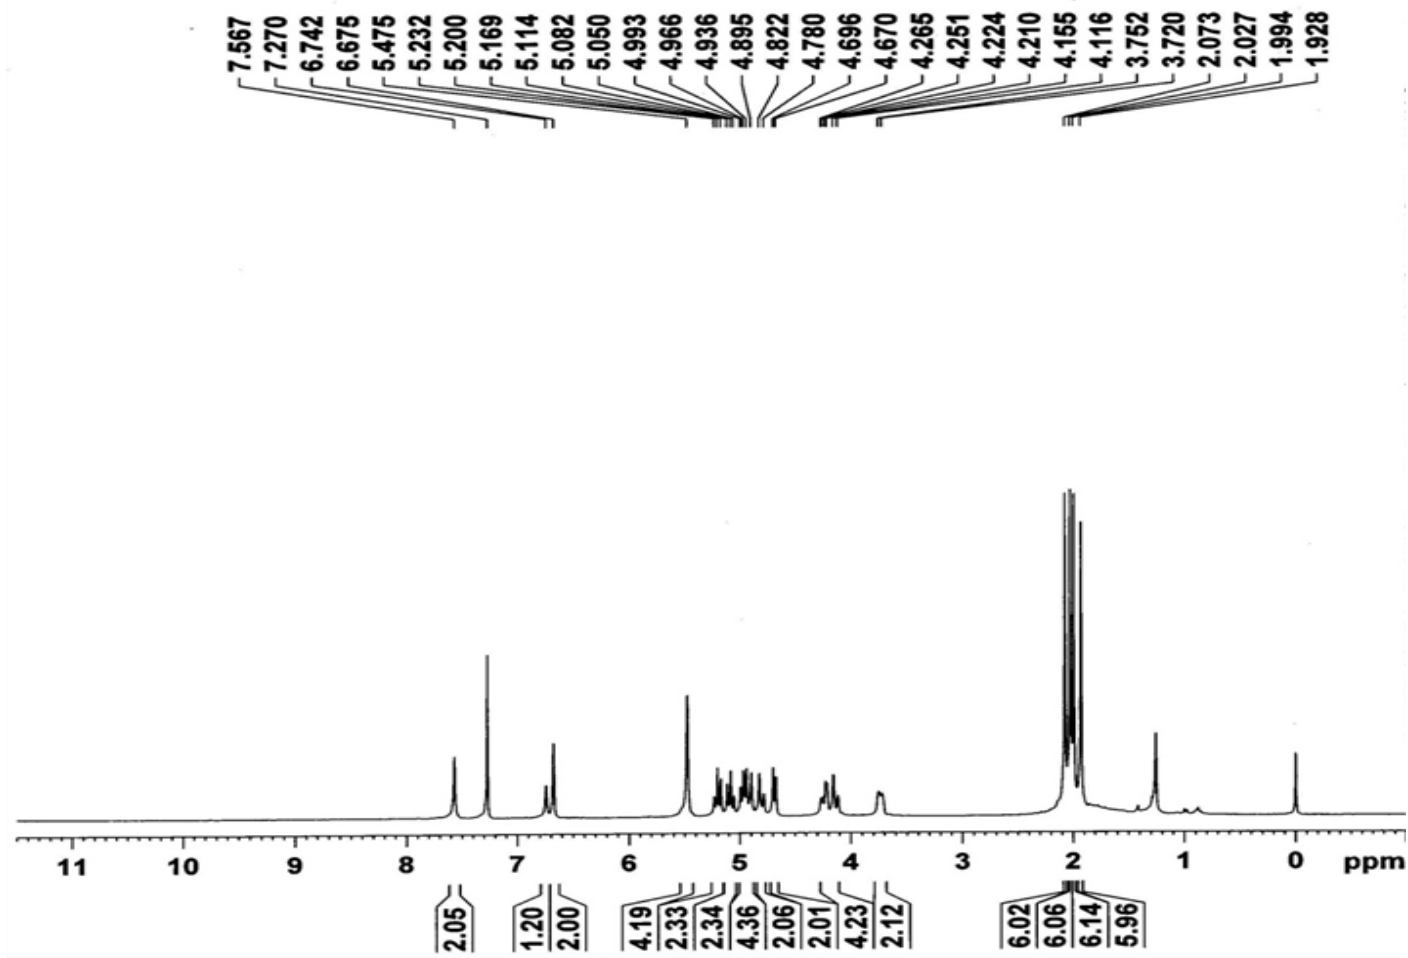

<sup>1</sup>H (CDCl<sub>3</sub>) NMR (300 MHz) spectrum of Compound 6

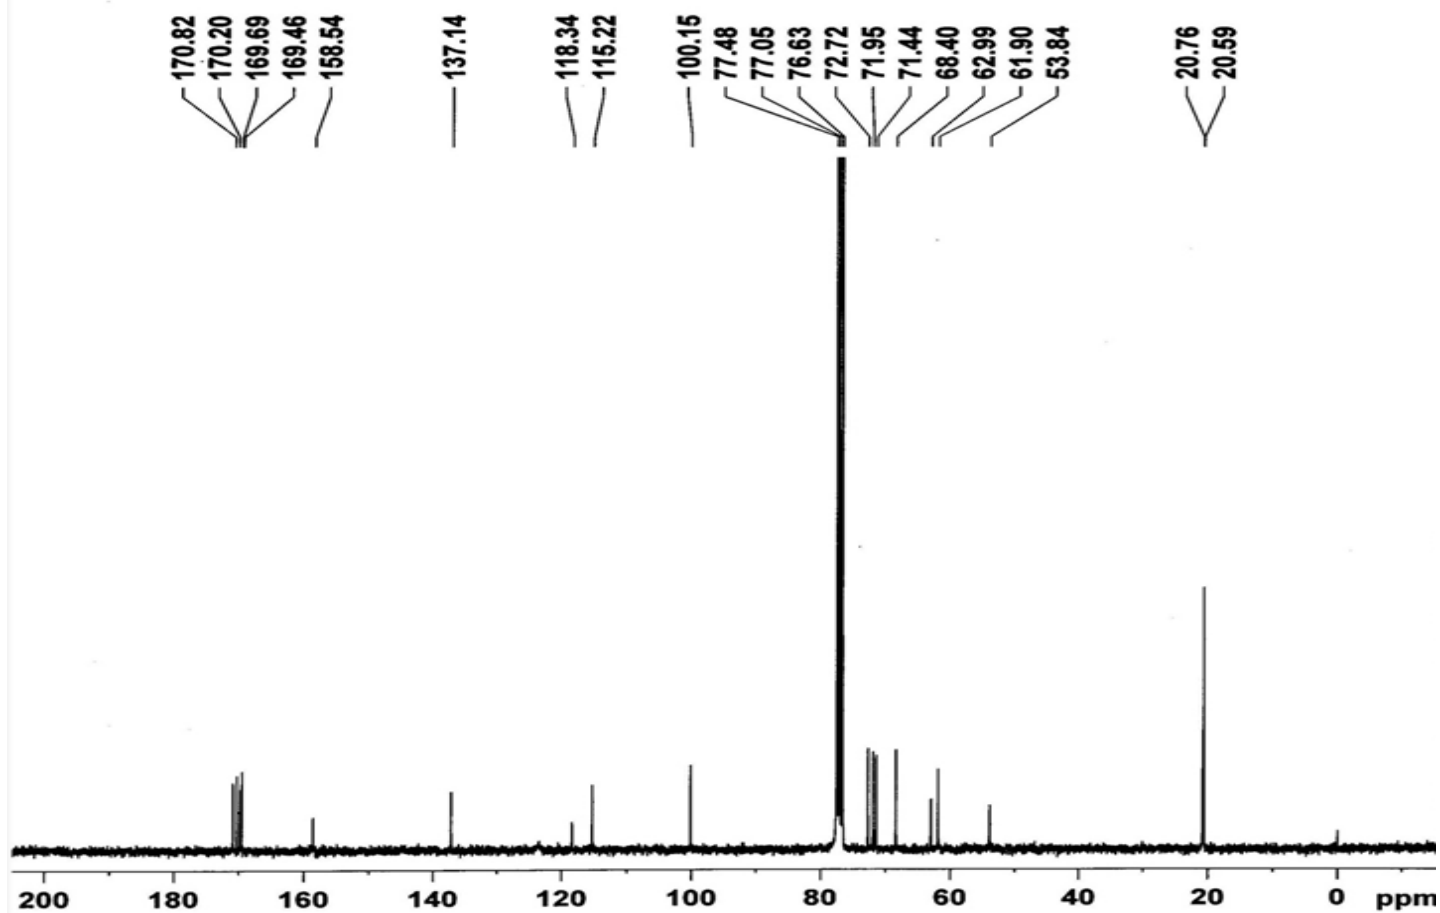

$^{13}\text{C}$  ( $\text{CDCl}_3$ ) NMR (75 MHz) spectrum of Compound 6

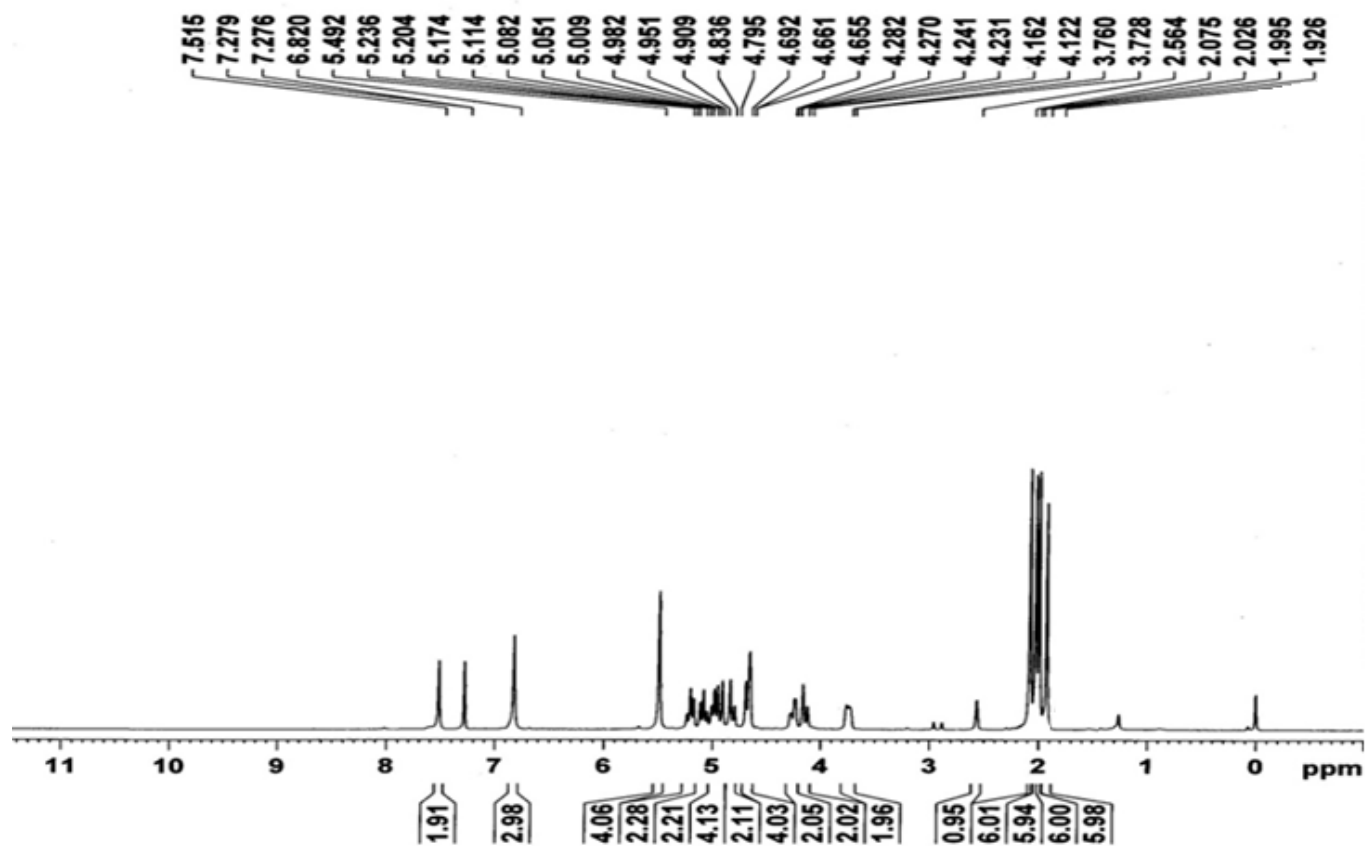

$^1\text{H}$  ( $\text{CDCl}_3$ ) NMR (300 MHz) spectrum of Compound 7

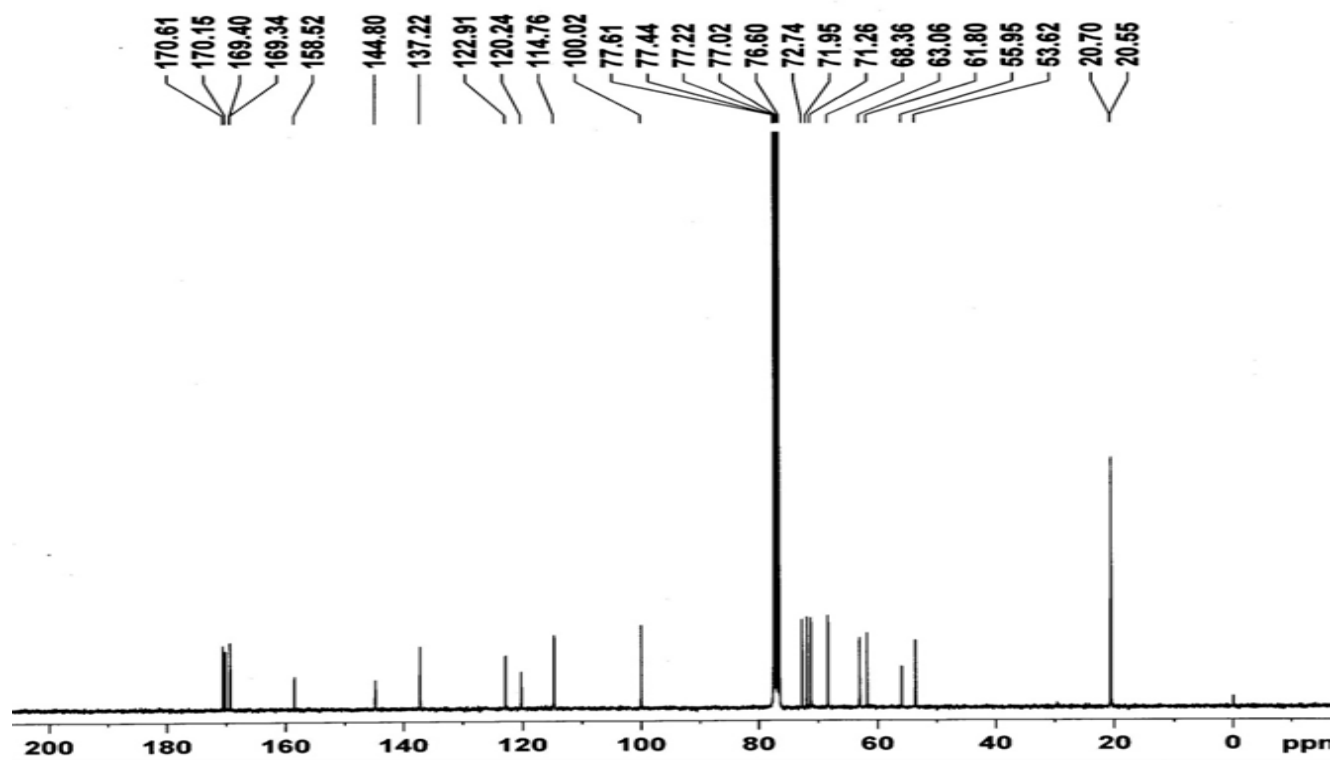

$^{13}\text{C}$  ( $\text{CDCl}_3$ ) NMR (75 MHz) spectrum of Compound 7

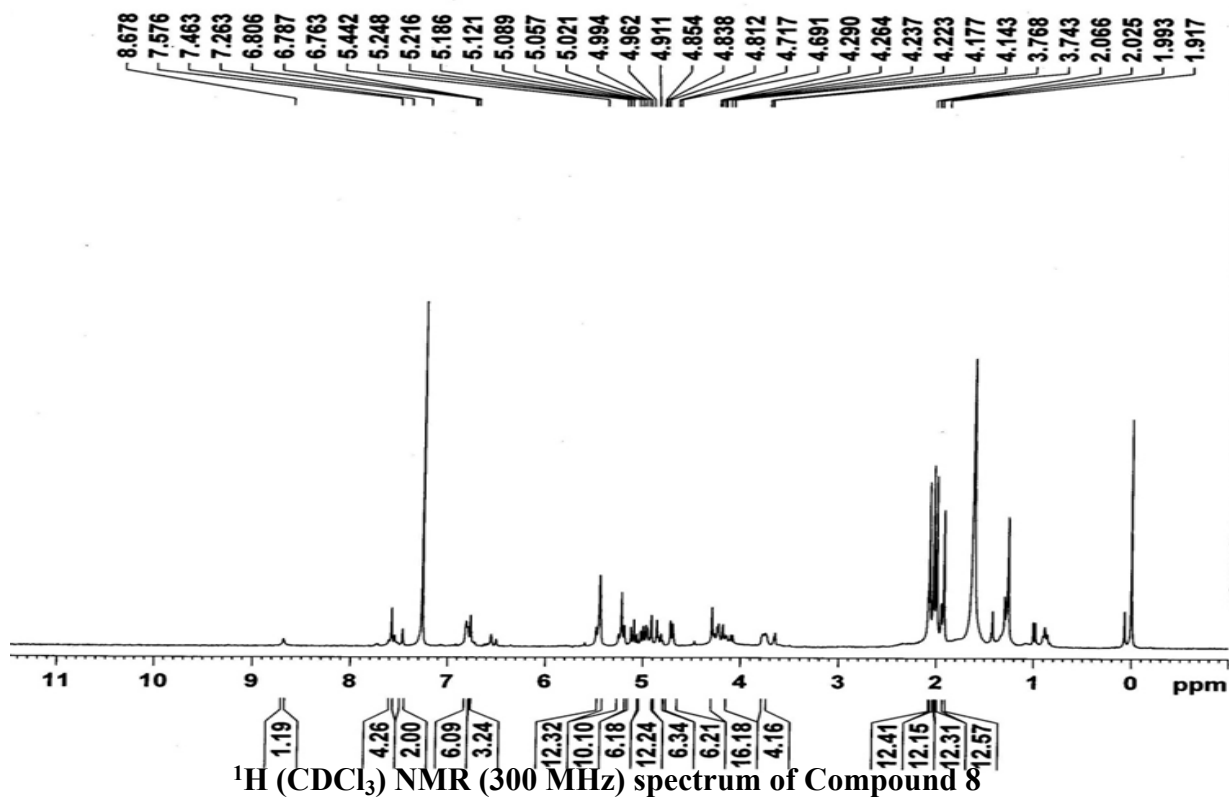

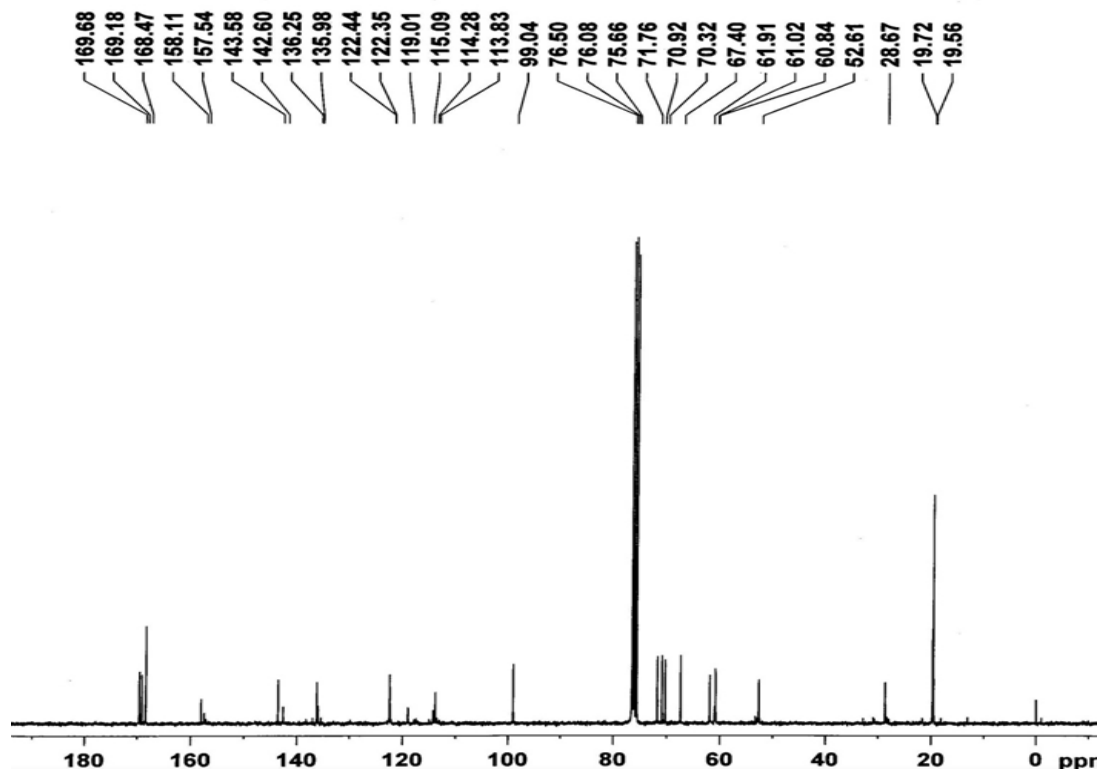

$^{13}\text{C}$  ( $\text{CDCl}_3$ ) NMR (75 MHz) spectrum of Compound 8

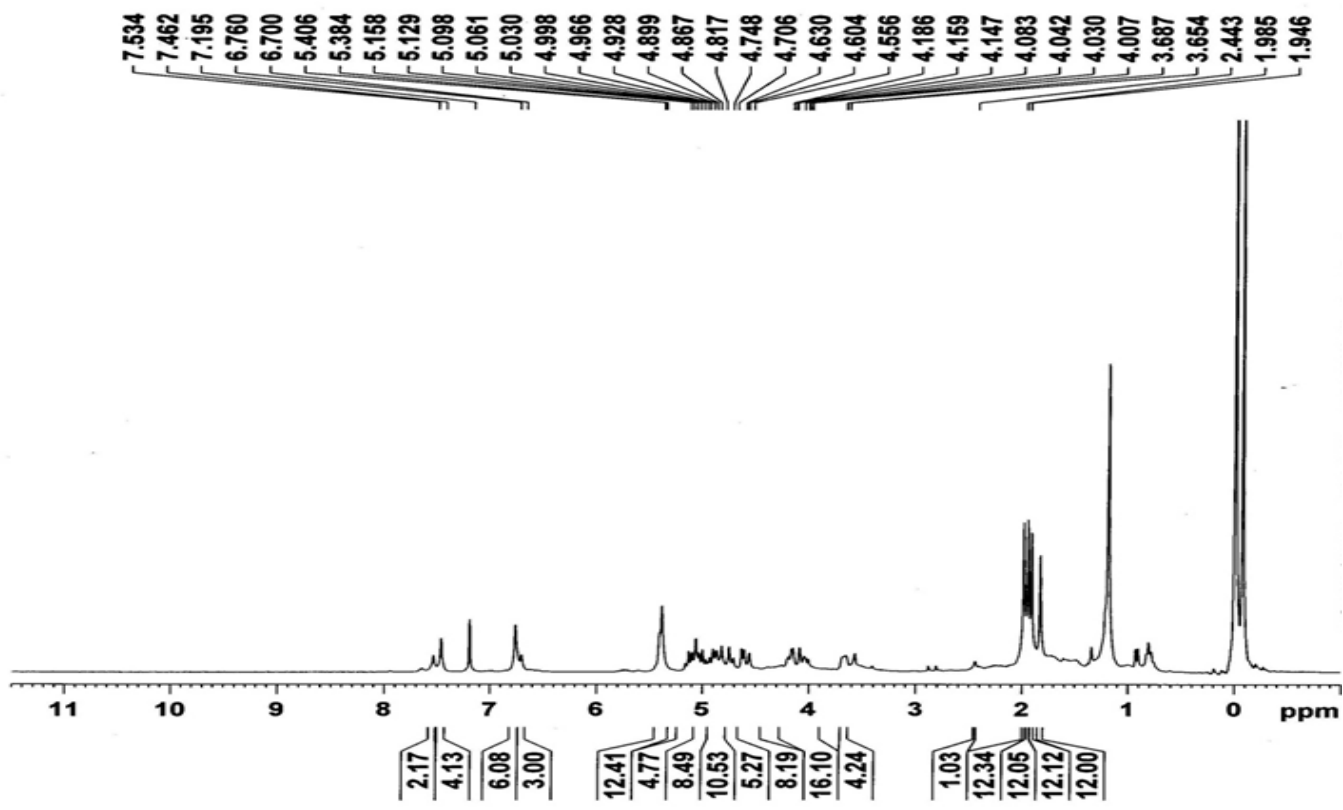

<sup>1</sup>H (CDCl<sub>3</sub>) NMR (300 MHz) spectrum of Compound 9



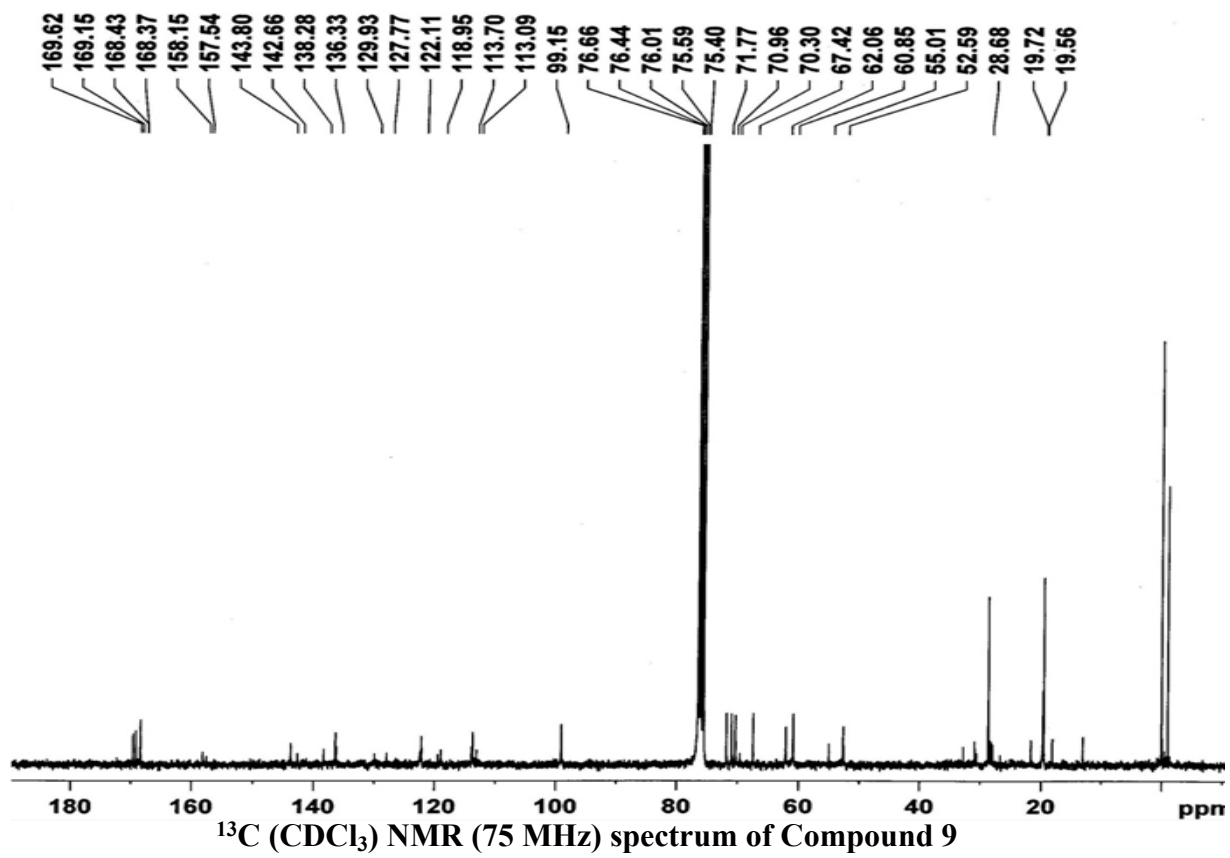

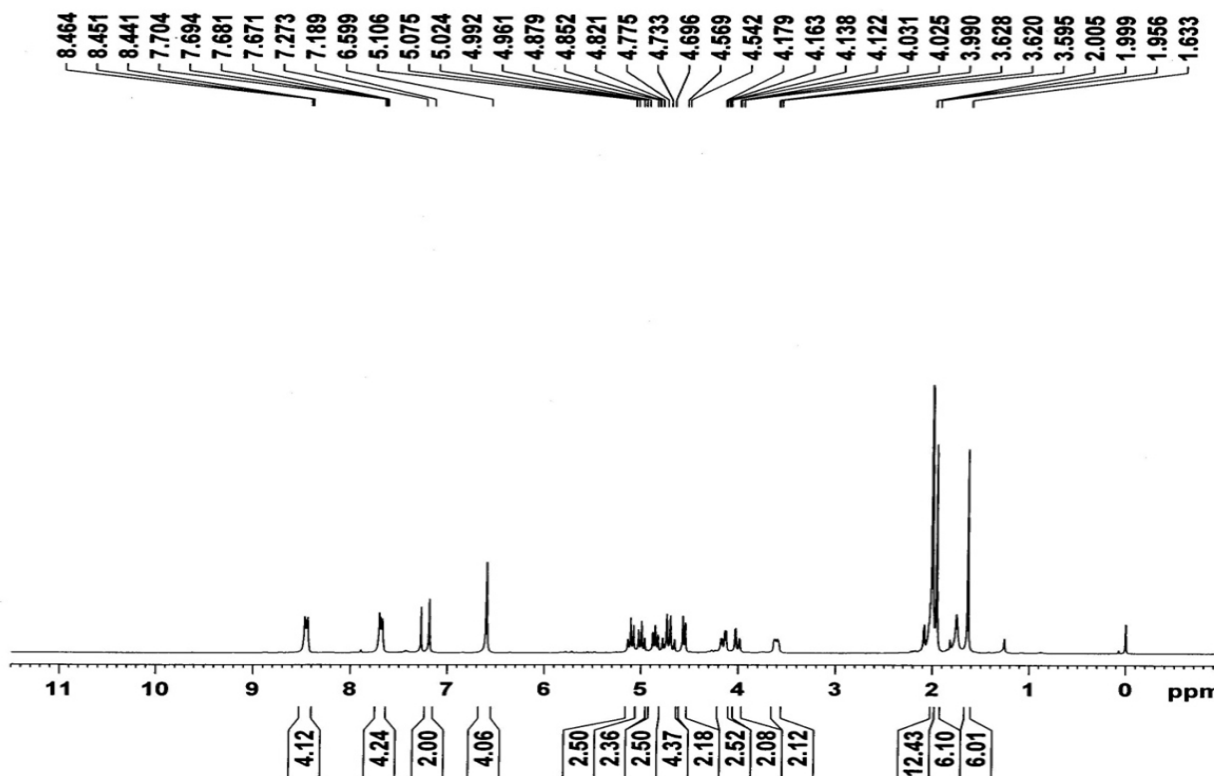

$^1\text{H}$  ( $\text{CDCl}_3$ ) NMR (300 MHz) spectrum of glycodendrimer 1

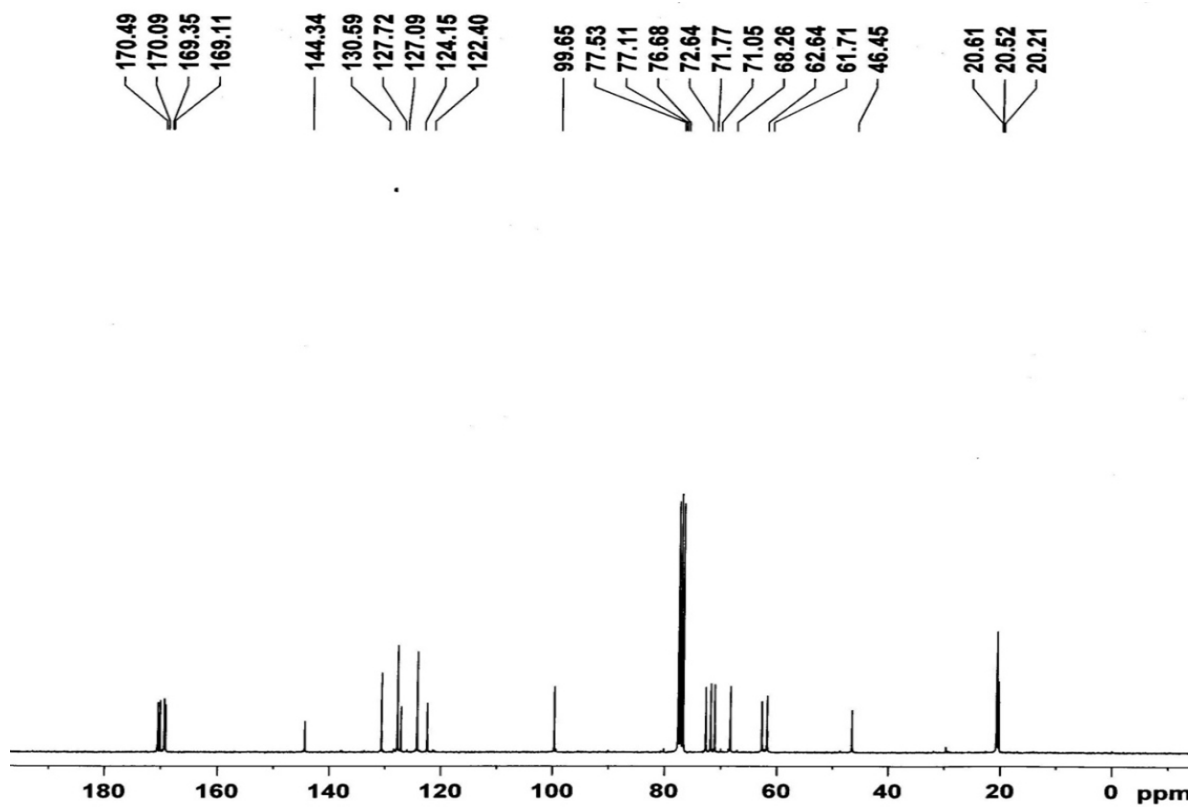

$^{13}\text{C}$  ( $\text{CDCl}_3$ ) NMR (75 MHz) spectrum of glycodendrimer 1

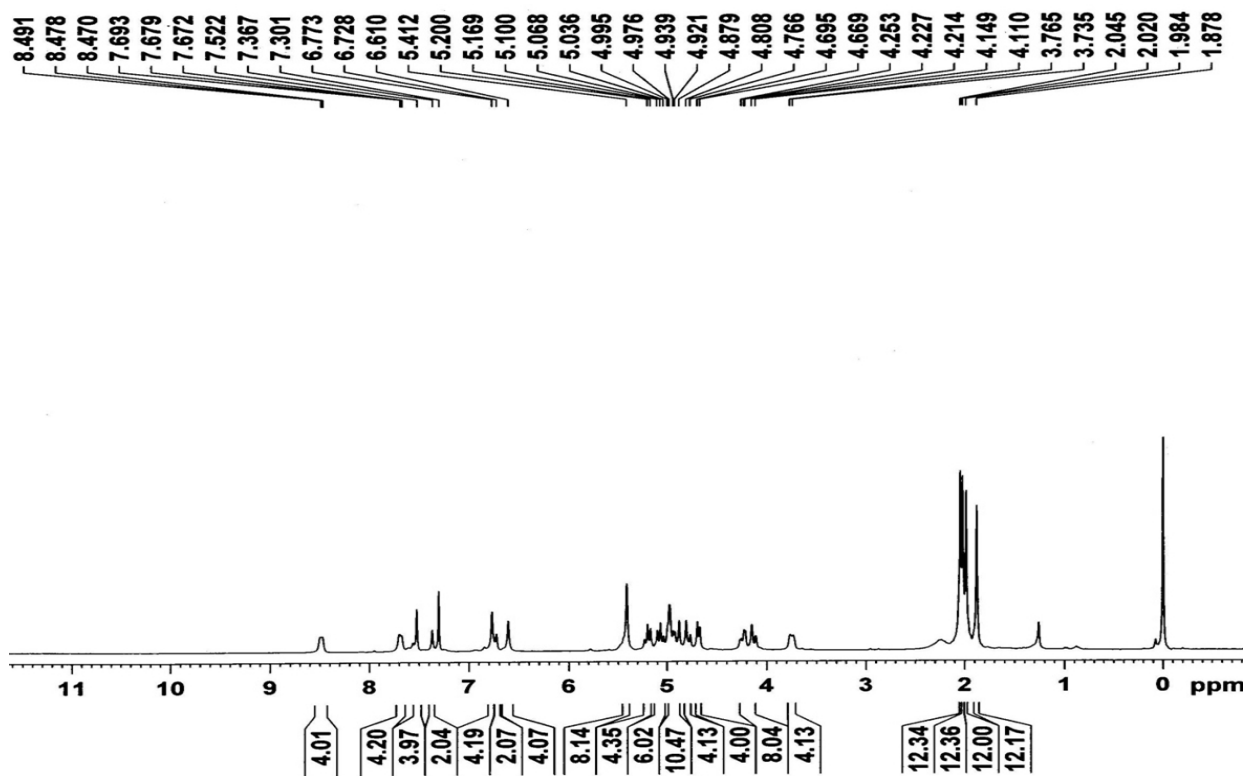

$^1\text{H}$  ( $\text{CDCl}_3$ ) NMR (300 MHz) spectrum of glycodendrimer 2

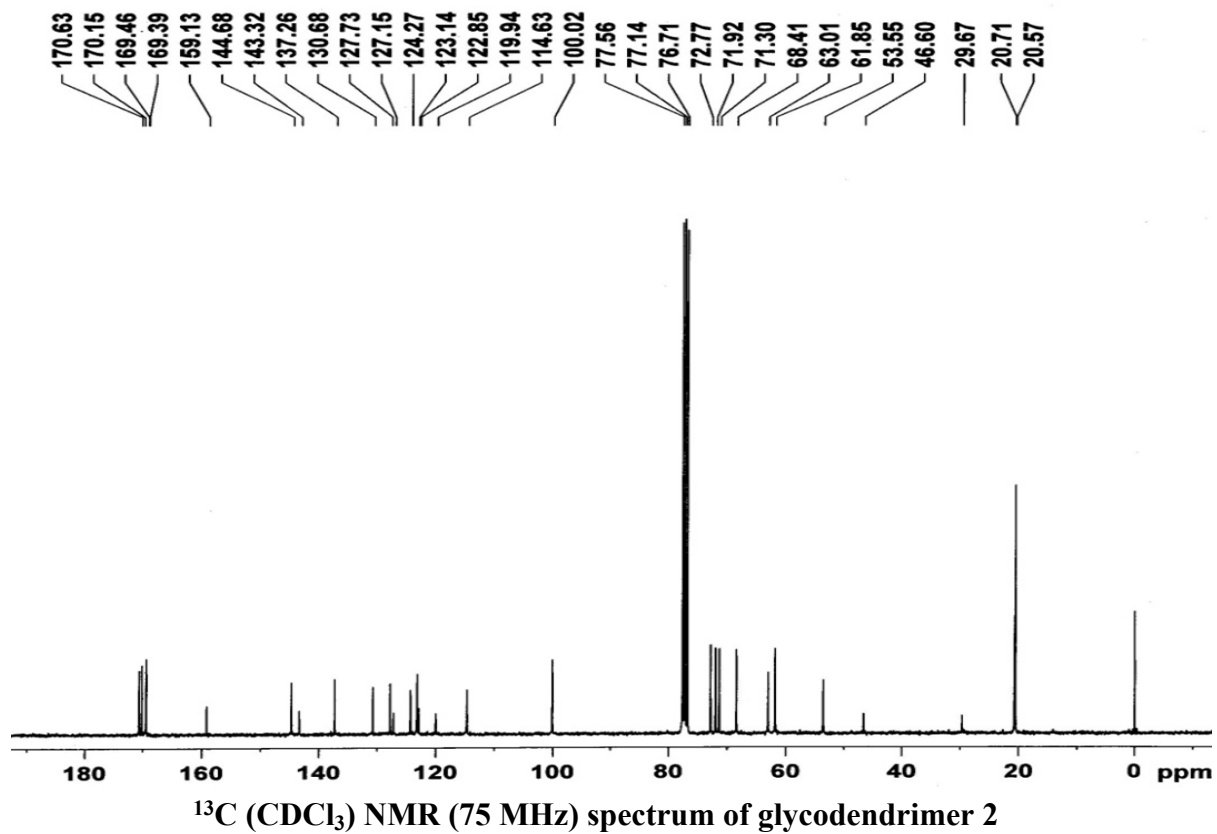

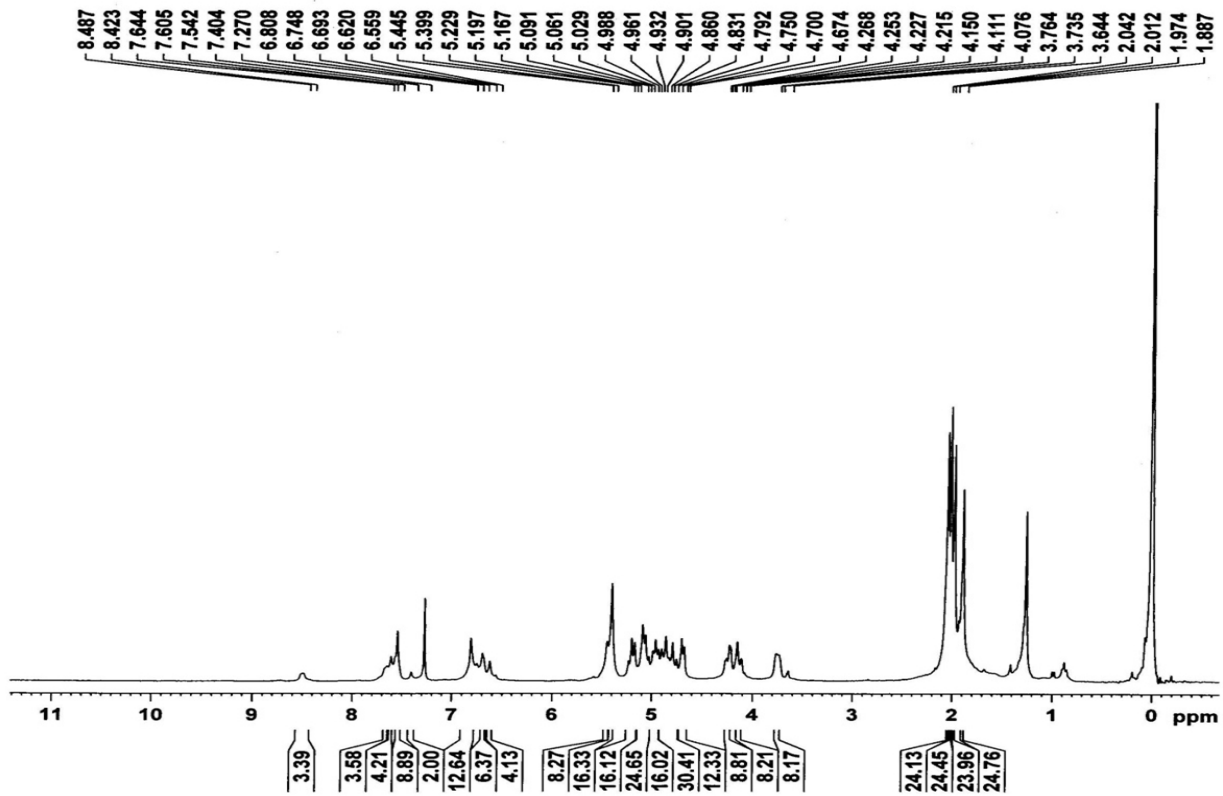

$^1\text{H}$  ( $\text{CDCl}_3$ ) NMR (300 MHz) spectrum of glycodendrimer 3

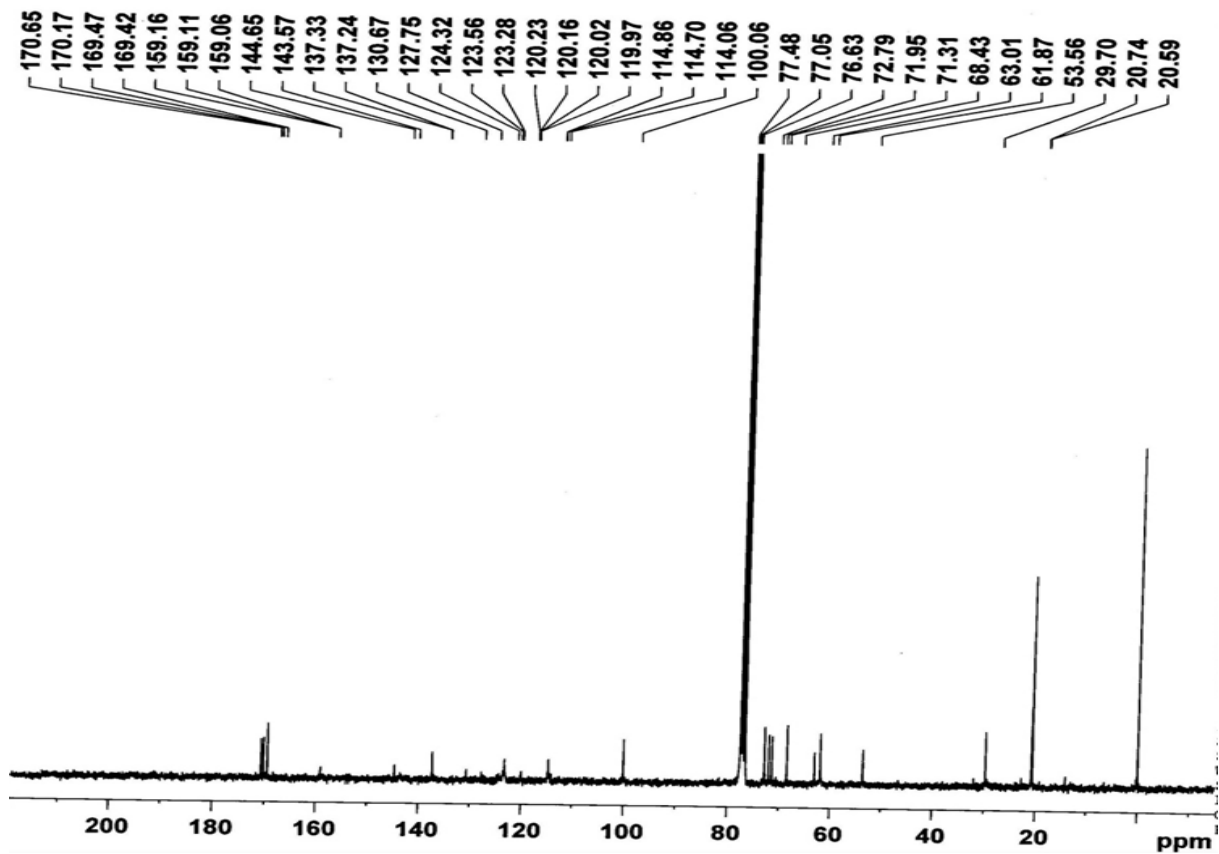

$^{13}\text{C}$  ( $\text{CDCl}_3$ ) NMR (75 MHz) spectrum of glycodendrimer 3
